# Supplementary material
Source: Springer Nature journal article supplement (https://www.springermedizin.de/resource/supplementary/12933_2009_174_MOESM3_ESM.pdf/9539756)

### DIABETICS

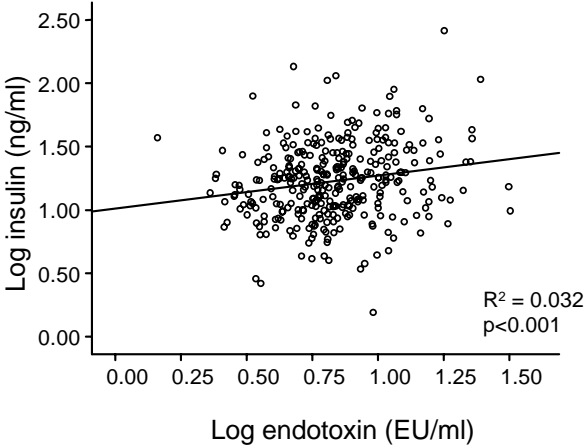

### DIABETICS

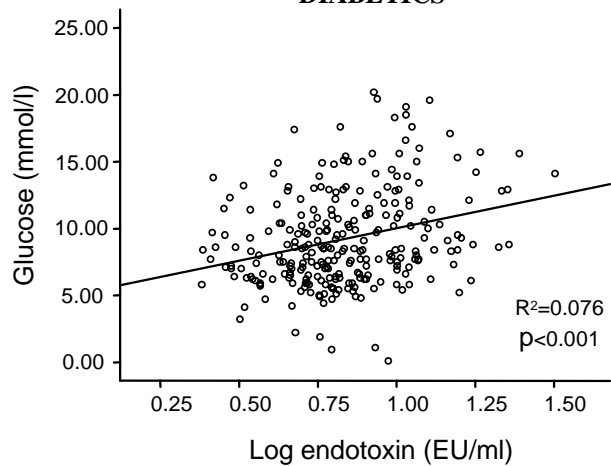

### NON-DIABETICS

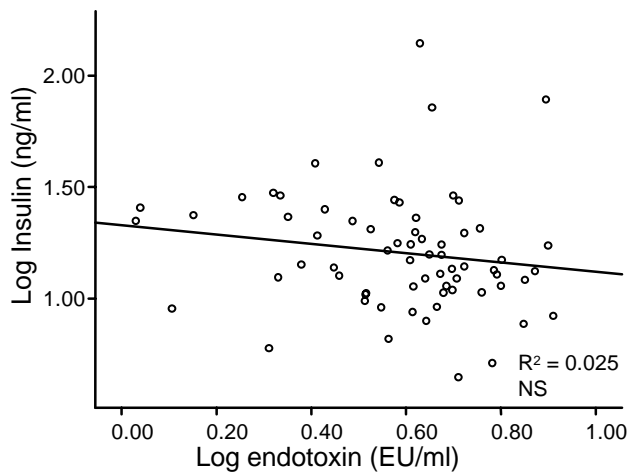

### NON-DIABETICS

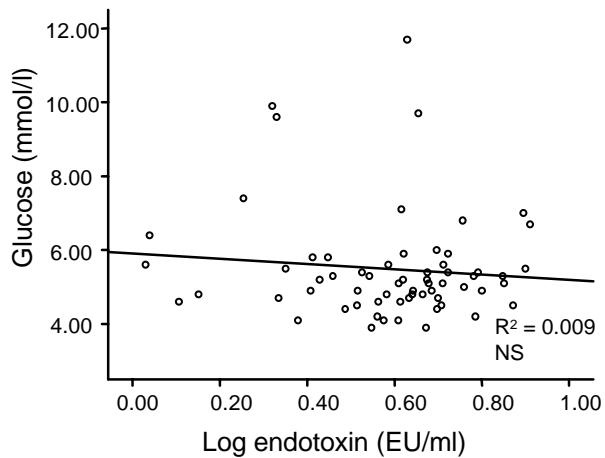

Supplement: MOESM3 [file 9539756]
